# Supplementary material for: Conductive carbon fabric generation from single-step upcycling of textile waste
Source: Royal Society of Chemistry journal article supplement (doi:10.1039/d3se01722b), 2024-01-01
Supplement: d3se01722b1.pdf [file d3se01722b1.pdf]

## Electronic Supplementary Information (ESI)

### **Conductive carbon fabric generation from single-step upcycling of textile waste**

*Carles Tortosa,<sup>a</sup> Marina Navarro-Segarra,<sup>a</sup> Pedro Guerrero,<sup>ab</sup> Koro de la Caba,<sup>ab</sup> Juan Pablo Esquivel<sup>ac</sup>*

- a. BCMaterials, Basque Center for Materials, Applications and Nanostructures, UPV/EHU Science Park, Leioa, Spain.
- b. BIOMAT Research Group, University of the Basque Country (UPV/EHU), Escuela de Ingeniería de Gipuzkoa, Plaza de Europa 1, 20018 Donostia-San Sebastián, Spain
- c. IKERBASQUE, Basque Foundation for Science, 48009 Bilbao, Spain

## Supplementary material

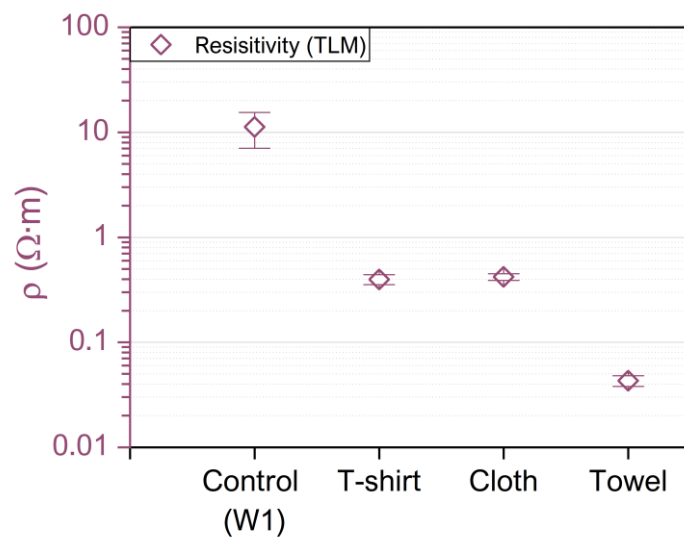

**Figure S1.** Resistivity values for each carbonized sample. Error bars account for the standard deviation of N=3 measurements.

## TLM raw data

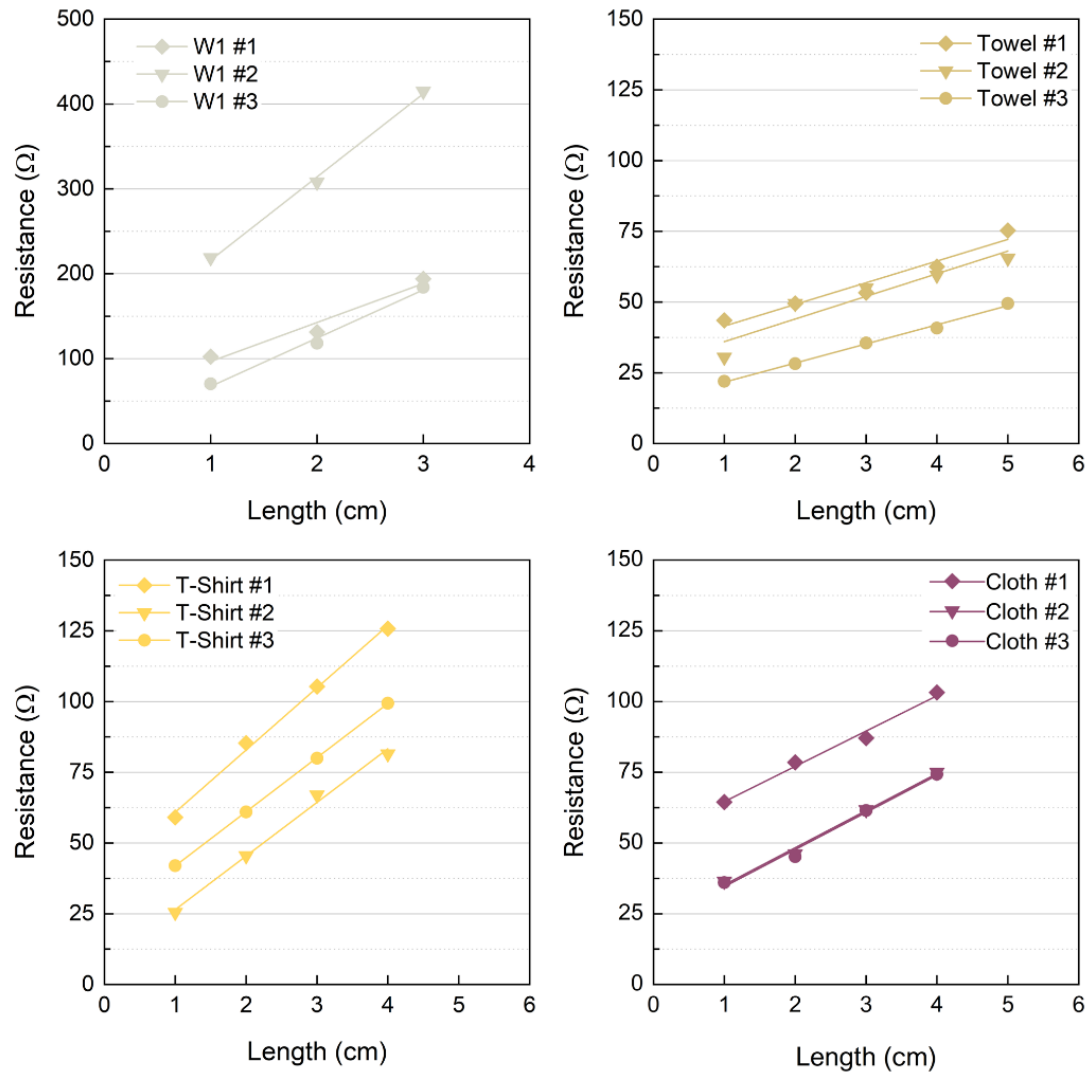

**Figure S2.** Raw data from TLM measurement for all samples, with each linear fit. Resistivity values are obtained by averaging the slope of each curve.

|            | Repeat | Intercept | $u_n$ | Slope | $u_m$ | $R^2$   |
|------------|--------|-----------|-------|-------|-------|---------|
| Control W1 | #1     | 50.7      | 20.8  | 45.9  | 9.6   | 0.91548 |
|            | #2     | 118.0     | 11.2  | 98.0  | 5.2   | 0.99439 |
|            | #3     | 10.4      | 11.3  | 56.9  | 5.2   | 0.98325 |
| T-shirt    | #1     | 38.9      | 2.8   | 22.0  | 1.0   | 0.99353 |
|            | #2     | 7.5       | 2.9   | 19.0  | 1.1   | 0.99072 |
|            | #3     | 22.8      | 0.2   | 19.1  | 0.1   | 0.99996 |
| Towel      | #1     | 33.8      | 3.3   | 7.7   | 1.0   | 0.93430 |
|            | #2     | 28.0      | 5.3   | 8.0   | 1.6   | 0.85847 |
|            | #3     | 14.9      | 0.9   | 6.8   | 0.3   | 0.99360 |
| Cloth      | #1     | 52.2      | 2.7   | 12.5  | 1.0   | 0.98204 |
|            | #2     | 22.1      | 2.2   | 13.1  | 0.8   | 0.98873 |
|            | #3     | 21.5      | 2.6   | 13.1  | 0.9   | 0.98472 |

**Table S1.** Values corresponding to the linear fit's regression lines, according to expression of variables:  $y=mx+n$ , where  $m$  is the slope and  $n$  the intercept with the Y axis at  $x=0$ . Thus,  $u_m$  and  $u_n$  correspond to the uncertainty of each value, respectively.

### Contact angle

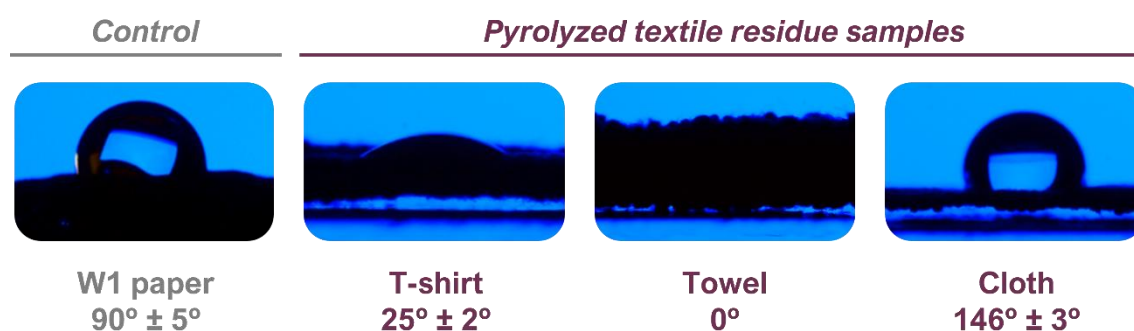

**Figure S3.** Contact angle results for all the samples. Control W1 is slightly hydrophobic, while Cloth is significantly hydrophobic; on the other side, T-shirt and Towel samples are completely hydrophilic. Specifically, Towel samples adsorbed the water drop instantly, thus is not seen in the picture.

## Charge transfer qualitative analysis

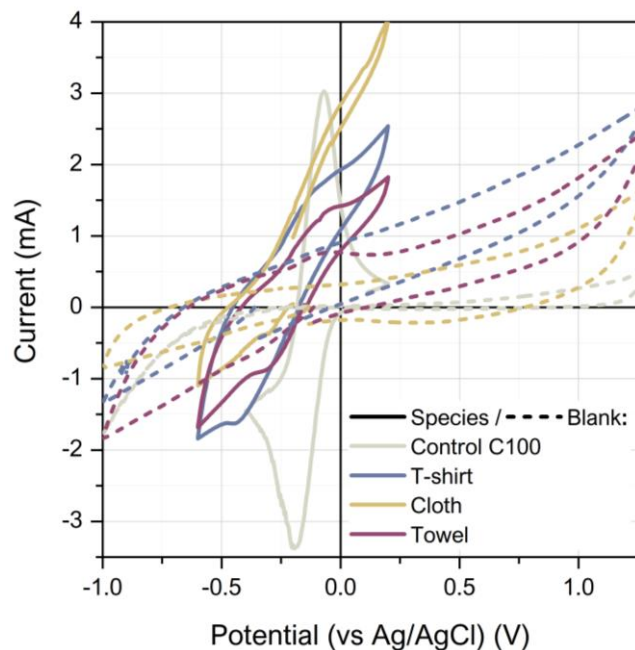

**Figure S4.** Cyclic voltammograms using the textiles as Working electrode in two different water-based solutions (both with KCl 1M as electrolyte): one with the reversible redox specie p-benzoquinone (solid line), and one only with the electrolyte (dashed lines). Some current is obtained at the operating voltages (between -0.5V and 0.5V) with the blank, but not enough to overshadow the Faradaic currents obtained with the solution containing the redox species.

## Proof of concept set-up

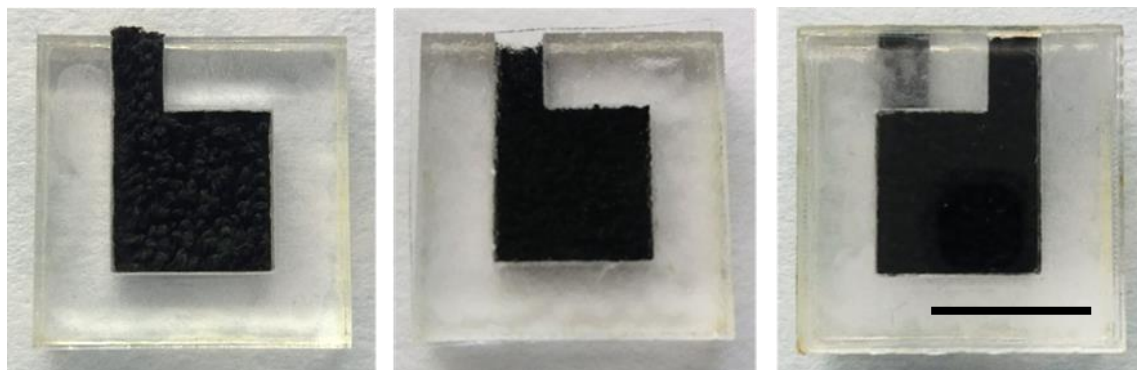

**Figure S5.** Photograph of the galvanic cell assembly set-up before adding reactants: Left, one side bare; Center, the other side with the ionic membrane; Right, assembled cell. Scale bar = 1 cm (accounts for all pictures).
